1  
2  
3  
4  
5  
6  
7  
8  
9  
10  
11  
12  
13  
14  
15  
16  
17  
18  
19  
20  
21  
22  
23  
24

*Title:*

**Efficient assembly and long-term stability of defensive microbiomes via private resources and community bistability**

*Running title:*

**Microbiomes via private resources and bistability**

*Authors:*

Gergely Boza<sup>1,2,\*</sup>, Sarah F. Worsley<sup>3</sup>, Douglas W. Yu<sup>3,4,5</sup>, and István Scheuring<sup>1,6</sup>

*Affiliations:*

<sup>1</sup>Evolutionary Systems Research Group, MTA-ÖK-BLI Centre for Ecological Research, Hungarian Academy of Sciences, Tihany, Hungary; <sup>2</sup>International Institute for Applied Systems Analysis (IIASA), Laxenburg, Austria; <sup>3</sup>School of Biological Sciences, University of East Anglia, Norwich Research Park, Norwich, United Kingdom; <sup>4</sup>State Key Laboratory of Genetic Resources and Evolution, Kunming Institute of Zoology, Chinese Academy of Sciences, Kunming, Yunnan, 650223, China; <sup>5</sup>Center for Excellence in Animal Evolution and Genetics, Chinese Academy of Sciences, Kunming Yunnan, 650223 China; <sup>6</sup>MTA-ELTE Theoretical Biology and Evolutionary Ecology Research Group, Hungarian Academy of Sciences, Budapest, Hungary.

\* Email: [boza.gergely5@gmail.com](mailto:boza.gergely5@gmail.com); [boza@iiasa.ac.at](mailto:boza@iiasa.ac.at); Telephone number: +36-1-372-2500/1706; Address: Klebelsberg Kunó str. 3, H-8237 Tihany, Hungary.

The authors declare no conflict of interest.

## 25 **Abstract**

26 Understanding the mechanisms promoting the assembly and maintenance of host-beneficial  
27 microbiomes is an open problem. An increasing amount of evidence supports the idea that  
28 animal and plant hosts can use ‘private resources’ and the ecological phenomenon known as  
29 ‘community bistability’ to favour some microbial strains over others. We briefly review empirical  
30 evidence showing that hosts can: (i) protect the growth of beneficial strains in an isolated  
31 habitat, (ii) use antibiotic compounds to suppress non-beneficial, competitor strains, and (iii)  
32 provide resources (for a limited time) that only beneficial strains are able to translate into an  
33 increased rate of growth, reproduction, or antibiotic production. We then demonstrate in a  
34 spatially explicit, individual-based model that these three mechanisms act similarly by  
35 selectively promoting the initial proliferation of preferred strains, that is, by acting as a private  
36 resource. By explicitly modelling localized microbial interactions and diffusion dynamics, we  
37 further show that an intermediate level of antibiotic diffusion is the most efficient mechanism in  
38 promoting preferred strains and that there is a wide range of conditions under which hosts  
39 can promote the assembly of a self-sustaining defensive microbiome. This, in turn, supports the  
40 idea that hosts readily evolve to promote host-beneficial defensive microbiomes.

## 41 Introduction

42 A growing number of studies show that microbiome composition is structured by competition [1,  
43 2, 3, 4, 5, 6, 7], and it is hypothesized that a host could evolve to bias these processes to  
44 promote the establishment of host-beneficial microbes [6, 8, 9, 10, 11, 12, 13]. Indeed, such  
45 microbes need support because, first, it is inherently difficult to establish a colony of host-  
46 beneficial microbes in the face of competition against the huge pool of available host-neutral or  
47 host-harmful species [1, 14, 15, 16, 17], and second, these microbes often produce costly  
48 compounds that, although equipping them to be beneficial for the host, render them  
49 competitively inferior to non-beneficial, or even parasitic, microbes [18].

50 We distinguish three mechanisms by which a host can selectively favour beneficial strain(s),  
51 namely (1) *providing a habitable space* that the desired bacterial partner has preferential access  
52 to, (2) *production of specific compounds* by the host that selectively poison undesired bacteria,  
53 and (3) *providing a food resource* that the desired partner is better able to metabolise. We now  
54 briefly review examples of each:

55 1. *Providing a habitable space that the desired bacterial partner has preferential access to.* —  
56 Vertical and pseudo-vertical transmissions fall into this category [1, 19, 20, 21, 22, 23]. In  
57 strict vertical transmission, host germline cells are infected with symbionts [22, 24]. Less  
58 strict transmission ('pseudo-vertical') is achieved by keeping non-colonised host offspring in  
59 isolation after birth until the parental microbiome can colonise it, which then shapes the  
60 composition of subsequent colonists from the environment [9, 11, 22]. In either case, the  
61 host ensures a 'competitor-free space' for inherited microbes, which are allowed time and  
62 resources to grow on a new-born host before being exposed to competition with other  
63 colonists. For example, newly emerging *Acromyrmex* leafcutter ants are inoculated with  
64 antibiotic-producing *Pseudonocardia* bacteria within a 24-hour window after hatching [8, 25].  
65 Mature worker ants serve as the source, carrying *Pseudonocardia* on their propleural plates,

66 which grow to high density around specialised exocrine glands that likely provide nutrients  
67 for bacterial growth [26, 27] (thus also serving as an example of a resource that can be  
68 metabolized by the preferred bacteria, discussed in 3. below). Similarly, female beewolf  
69 digger wasps (*Philanthus*, *Philanthinus*, *Trachypus*) inoculate their brood cell walls with  
70 species of *Streptomyces* that they maintain in their antennal glands [28, 29, 30]. These  
71 bacteria become directly incorporated into the larval cocoon, where they dominate and  
72 produce an array of antibiotics that protect the developing larva against infection [29, 30,  
73 31]. Analogous to the above examples, the agricultural process of applying bacteria, such as  
74 antibiotic-producing *Pseudomonas* and nitrogen-fixing *Rhizobia*, to crop seeds before  
75 sowing mimics pseudo-vertical-transmission, by ensuring that high densities of beneficial  
76 bacteria have better access to root exudates and are favoured during establishment on the  
77 plant [32, 33]. Priority effects have also been demonstrated for mycorrhizae [34], bees [35,  
78 36, 37, 38], wasps [28], leafcutter ants [25, 39], birds [40], plants [41], and humans [42].

79 2. *Hosts producing compounds poisoning non-desired bacteria, whilst allowing desired strains*  
80 *to grow.* — A wide range of plants secrete compounds, known as allelochemicals, that have  
81 toxic effects on a broad range of bacteria, fungi, and invertebrates in the rhizosphere, as  
82 well as other plants growing nearby [43, 44, 45, 46]. For example, the compound DIMBOA is  
83 an antimicrobial produced by maize seedlings [45], which the plant-beneficial species  
84 *Pseudomonas putida* is able to degrade, thus avoiding its effects. *P. putida* also uses this  
85 compound as a chemoattractant and a signal for upregulating the production of the broad-  
86 spectrum antibiotic phenazine [45]. Together, these mechanisms allow *P. putida* to colonise  
87 maize roots in the presence of mostly DIMBOA-intolerant, competitor bacteria [45]. Similarly,  
88 the rhizobial species, *Mesorhizobium tianshanense*, which forms root nodules on liquorice  
89 plants is able to outcompete other bacteria in the rhizosphere due to an efflux mechanism  
90 that confers resistance to the antimicrobial compound canavanine. Canavanine is abundant

91 in liquorice root exudates and thus allows the host to filter out non-beneficial rhizobial  
92 species [47].

93 As another example, nitric oxide (NO), a potent oxidising agent and antimicrobial, can  
94 play an important role in dictating symbiont specificity [48, 49]. A classic example arises  
95 during the symbiosis between the bobtail squid, *Euprymna scolopes*, and bioluminescent  
96 bacteria in the species *Vibrio fischeri*. *V. fischeri* are the exclusive colonisers of the squid's  
97 light organ, where they emit light to deceive predators, and are acquired horizontally from  
98 the environment within 48 hours after squid hatching [50]. High nitric-oxide synthase (NOS)  
99 activity and its product NO can be detected in the epithelial mucus of the light organ during  
100 the early stages of bacterial colonisation [51], which *V. fischeri* are able to tolerate via the  
101 activity of two proteins, flavohemoglobin (*Hmp*) and a heme NO/oxygen-binding protein (H-  
102 NOX) [52, 53, 54, 55]. Eliminating the genes for these proteins in *V. fischeri* leads to  
103 colonisation deficiency [53, 55], and diminishing the concentration of host NO results in a  
104 greater diversity of non-mutualistic bacterial species in the light organ epithelium [51].  
105 Similar mechanisms of host selection are reported for animals as well. For example,  
106 members of the *Hydra* family produce antibacterial arminins that help them to shape the  
107 establishment of the bacterial microbiota during their embryogenesis [56]. *Hydra* not only  
108 suppress the undesired strains [56] but also modify the quorum-sensing signals through  
109 which bacteria communicate, hence manipulating the social behaviour of bacteria [57].

110 3. *A food resource that the desired partner is better able to metabolise.* — Enhanced  
111 metabolic activity from consuming a private resource can confer competitive superiority to a  
112 preferred microbial strain. Besides acquiring higher reproduction and growth rates, the  
113 beneficial bacteria can also achieve a higher rate of antibiotic production, resulting in the  
114 suppression of competitors [58], or a higher production of other factors that promote  
115 colonization and symbiotic interaction with the host, such as adhesive molecules facilitating  
116 biofilm formation on the host surface [59, 60]. The provision of specific metabolites is

117 thought to play a key role in structuring the species-specific microbial communities  
118 associated with marine corals [61, 62]. Coral juveniles, as well as their dinoflagellate  
119 symbionts, produce large quantities of the compound dimethylsulfoniopropionate (DMSP)  
120 [63]. *In vitro* and metagenomic studies have shown that several coral-associated bacterial  
121 groups can specifically metabolise the DMSP and use it as a sole carbon and sulphur  
122 source [61, 62, 64]. Such species are also amongst the first bacteria to colonise coral  
123 larvae, suggesting a nutritional advantage for them over bacteria that cannot degrade DMSP  
124 [61, 65]. This includes a species of *Pseudovibrio* which can additionally use DMSP as a  
125 precursor for the production of antibiotics which inhibit coral pathogens [62]. Another  
126 example of a specific host-derived resource is human breast milk, which is known to contain  
127 a large number of complex oligosaccharides that are preferentially consumed by a single  
128 species of co-adapted gut bacterium *Bifidobacterium longum* subsp. *infantis* [66].

129 In plants, experiments have shown that root exudates can be directly metabolised by the  
130 microorganisms that live endophytically within the plant roots [67, 68, 69]. Different species  
131 exude different groups of metabolites, and studies suggest that plant hosts may be able to  
132 tailor root exudate composition in order to recruit bacteria with particular metabolic traits [43,  
133 67, 70]. For example, the concentration of the plant phytohormone salicylic acid (SA) has  
134 been shown to correlate with the abundance of several bacterial taxa, including the  
135 antibiotic-producing genus *Streptomyces* [70, 71], which can use SA as a sole carbon  
136 source [71, 72]. As discussed earlier, leaf-cutter ants exocrine glands which provide a  
137 nutrient source for *Pseudonocardia* bacterial growth also fall into this category [26].

138 These mechanisms achieve one of two effects: (i) they either ensure the protected growth of  
139 the preferred strains and/or (ii) they enhance the competitive abilities of preferred strains against  
140 non-preferred strains for certain duration of time. Essentially, a *host can use multiple means to*  
141 *provide a 'private resource', in the form of space and/or food, to a subset of bacterial strains,*

142 and if those strains are beneficial to the hosts, the host is selected to evolve and apply one or  
143 more of these mechanisms to assemble host-beneficial microbiomes.

144 We now abstract these mechanisms into an individual-based, spatially-explicit model of host-  
145 associated defensive microbiomes (reviews in 9, 29, 30), which typically contain antibiotic-  
146 producing, and at the same time resistant, bacteria [73, 74]. In our model, dispersal and *direct*  
147 *competition for empty sites* is limited to small numbers of neighbouring individuals, in  
148 accordance with experimental results [75]. At the same time, due to diffusion, we allow *indirect,*  
149 *antibiotic-mediated competition* to occur amongst distant bacteria. We aim to understand the  
150 conditions under which host species can promote the growth and dominance of antibiotic-  
151 producing, defensive microbiomes.

## 152 **Materials and methods**

153 We are interested in how the host influences the population dynamics of two different  
154 bacterial strains: an antibiotic-producing, resistant beneficial strain (**B**), and a non-producing,  
155 sensitive parasitic strain (**P**) (Fig. 1a). We model the host implicitly by assuming it is able to  
156 manipulate the composition of its microbiome through resource supply on its surface, upon  
157 which colonising individual bacteria compete for space with their neighbours according to their  
158 reproduction rates. The host surface further serves as a medium for spatially limited diffusion of  
159 the antibiotic. For this, we employ an individual-based model in which we model the host  
160 surface as a rectangular grid with toroidal boundary conditions ( $N = M * M$ ) serving as the  
161 habitat for coloniser bacteria (Fig. 1b). Each grid point can be empty or inhabited by a single  
162 individual, and interactions take place within the immediate neighbourhood of the focal grid  
163 point. Time is measured in units of update steps. We assume that the dynamics of cell  
164 reproduction and death processes are much slower than the small-molecule dynamics, so the  
165 cell populations are updated after  $u$  ( $u \gg 1$ ) update steps in antibiotic dynamics, during which  
166 the whole grid is updated in all relevant intracellular and extracellular processes related to the

167 small-molecule (antibiotic) dynamics ( $N$  number of sites). In the cellular update steps,  $\varepsilon N$   
168 number of randomly chosen grid cells are updated in the birth and death processes, and  $\varepsilon$  is  
169 selected to be a small positive number (see Supplementary information 1).

170 The private resource(s) provided by the host can confer two kinds of benefits to the beneficial  
171 strain. We call the first kind **Protected Growth** (recall mechanisms 1 and 2 from *Introduction*),  
172 because *the parasitic strain is prevented from invading (i.e. colonising) the host until time  $\tau$* .  
173 Accordingly, **B** is given preferred access to host-provided food or space or is solely resistant to  
174 host-produced allelochemicals until time  $\tau$ , after which time the host resource is made ‘public’ by  
175 giving the parasitic strain access to host-provided food or space or by withdrawing the host-  
176 produced compounds facilitating **B** or poisoning **P**. We call the second kind **Enhanced**  
177 **Metabolism**, because *although **P** is allowed to invade starting from time 0, **B**’s metabolism is*  
178 *enhanced until time  $\tau$ , after which this enhancement lapses* (recall mechanism 3 from  
179 *Introduction*). The simplest outcome of enhanced metabolism is that **B**’s advantage in  
180 metabolising host-provided food causes its population growth rate to be increased by an amount  
181 of  $r_{B,pr}(t)$  until time  $\tau$ , after which  $r_{B,pr}(t) = 0$  (e.g.  $r_{B,pr}(t) \geq 0 | t < \tau$  and  $r_{B,pr}(t) = 0 | t \geq \tau$ ),  
182 where index pr denotes the private resource. An alternative outcome is that **B** is able to use the  
183 host-provided food to *increase its own antibiotic production rate* ( $\rho_B(t) = \rho_{B,pr}(t) + \rho_{B,0}$ ), without  
184 incurring higher unit costs. Thus, similarly as above, we distinguish a higher production rate  
185 fuelled by host-provided resource ( $\rho_{B,pr}(t) \geq 0 | t < \tau$ ), and a lower, baseline production rate  
186 when the resource is not supplied after time  $\tau$  ( $\rho_{B,pr}(t) = 0 | t \geq \tau$ ). Naturally,  $\rho_{B,0} > 0$ , while the  
187 production rate of the non-producing strain is always zero ( $\rho_P(t) = 0$ ). (Alternatively, but not  
188 modelled here, the resource could allow the antibiotic to be effective at a lower threshold  
189 concentration before  $\tau$  and at higher level after  $\tau$ , which would give similar results to the  
190 previous).



## 191 **Dynamics of the antibiotic molecules**

192 The beneficial strain produces and exports antibiotic at rate  $\rho_B$ , into the extracellular  
193 environment, resulting in a distribution of concentrations  $A^{\text{Ext}}(i, t)$  at position  $i$  at time  $t$ .

194 The molecules are taken up by the cells at rates  $\alpha_B$  and  $\alpha_P$  ( $\alpha_B \leq \alpha_P$ ) by the **B** and the **P**  
195 strains, respectively, resulting in an  $A^{\text{Int}}(i, t)$  interior concentration within the cell at position  $i$  at  
196 time  $t$ . The cells decompose the intracellular antibiotics at rates  $\gamma_B$  and  $\gamma_P$  ( $\gamma_B \geq \gamma_P$ ), and they  
197 can also perform active outbound transport, i.e. controlled efflux, to release intracellular  
198 antibiotics at rates  $\beta_B$  and  $\beta_P$  ( $\beta_B \geq \beta_P$ ). The antibiotics decays at rate  $\varphi$  in the environment.

199 The model implements the three major antibiotic-resistance mechanisms: (a) reduced influx  
200 through the membrane ( $\alpha_B$ ), (b) a higher rate of intracellular decomposition and neutralisation  
201 ( $\gamma_B$ ), and (c) increased efflux of the molecules ( $\beta_B$ ), and combinations of these mechanisms [73,  
202 76, 77, 78, 79].

203 Based on the continuous reaction-diffusion model of the detailed dynamics (see  
204 Supplementary information 2 for details) [80], the time-and-space-discretised dynamics of  
205 antibiotic concentration at site  $i$  on the grid and at time  $t + \Delta t$  in the extracellular environment  
206 can be written as

$$207 \quad (1) \quad A^{\text{Ext}}(i, t + \Delta t) = A^{\text{Ext}}(i, t) \\ + \left[ \frac{D}{\Delta x^2} \left( \sum_{j=1}^v A^{\text{Ext}}(j, t) - v A^{\text{Ext}}(i, t) \right) + \left( \rho_*(t) + \beta_* A^{\text{Int}}(i, t) - \alpha_* A^{\text{Ext}}(i, t) - \varphi A^{\text{Ext}}(i, t) \right) \theta(i) \right] \Delta t$$

208 where the first term corresponds to the diffusion of antibiotics according to the discretised  
209 diffusion algorithm between the four nearest neighbouring points ( $v = 4$ ) (Neumann-  
210 neighbourhood: north, south, east, west);  $\Delta x$  is the spatial resolution, and  $\Delta t$  is the time  
211 resolution. The diffusion rate of the antibiotics,  $D$ , is measured in the unit of  $x^2/t$ , where  $x$   
212 denotes the spatial resolution, here one cell of the grid, and  $t$  stands for time measured as an

213 update step.  $\theta(i)$  takes the value one if there is a cell at the site  $i$ , else being zero. The  
214 dynamics of intracellular concentration of the antibiotic at the site  $i$  can be written as

$$215 \quad (2) \quad A^{\text{Int}}(i, t + \Delta t) = A^{\text{Int}}(i, t) + \left( \alpha_* A^{\text{Ext}}(i, t) - \beta_* A^{\text{Int}}(i, t) - \gamma_* A^{\text{Int}}(i, t) \right) \Delta t.$$

216 Naturally  $A^{\text{Int}}(i, t + \Delta t) = A^{\text{Int}}(i, t) = A^{\text{Ext}}(i, t) = 0$  if there is no cell at site  $i$ .

## 217 **Growth dynamics of the cells**

218 For the birth and death processes, we define the growth rate of the antibiotic-producing (**B**) and  
219 non-producing (**P**) strains respectively as

$$220 \quad (3) \quad r_{\text{B}}(i, t) = r_{\text{B},0} + r_{\text{B},\text{pr}}(t) - c,$$

$$221 \quad r_{\text{P}}(i, t) = r_{\text{P},0} - \lambda(a, T, k, A^{\text{Int}}(i, t))$$

222 where  $c$  is the decrease in reproduction rate because of the costly processes of antibiotic  
223 production and resistance. The reproduction rates  $r_{\text{B},0}$ ,  $r_{\text{P},0}$ , and  $r_{\text{B},\text{pr}}(t)$  correspond to normal  
224 (baseline) and temporarily increased resource conditions, respectively. The effect of the  
225 antibiotic  $\lambda(a, T, k, A^{\text{Int}}(i, t))$  on the **P** strain's reproduction rate depends on the critical threshold  
226 ( $T$ ), the maximum effect ( $a$ ), the steepness of the dosage effect ( $k$ ), and the actual intracellular  
227 concentration of the antibiotic in the sensitive cell at the site  $i$  ( $A^{\text{Int}}(i, t)$ ). Following empirical  
228 observations [58], we define a general sigmoid function for the effect of the antibiotic:

$$229 \quad (4) \quad \lambda(a, T, k, A^{\text{Int}}(i, t)) = a / [1 + \exp(-k(A^{\text{Int}}(i, t) - T))]$$

## 230 **Dynamics of the population**

231 Population dynamics are represented by a death-birth process in which a randomly chosen  
232 focal individual at site  $i$  dies, and individuals from its Moore neighbourhood (8 nearest  
233 neighbours,  $w = 8$ ) can reproduce and place a progeny into this focal empty site, with  
234 probability proportional to their growth rates

$$235 \quad (5) \quad p(i) = r_{\xi}(i, t) / \sum_{j=1}^w r_{\xi}(j, t), \text{ where } (\xi \in \{\text{P}, \text{B}\})$$

236 At the beginning of the simulation, the beneficial strain is represented in low numbers ( $n_{B,0}$ ),  
237 and the parasitic strain is missing ( $n_{P,0} = 0$ ).

## 238 **Invasion tests**

239 We carried out two sets of invasion tests to demonstrate how host-provided private resources  
240 can result in self-sustaining, beneficial microbiomes, even if the advantage provided by the  
241 resource eventually diminishes. In the first test, we used time, while in the second, we used  
242 colony size as the signal to switch from private to public resources, or in other words, to stop the  
243 host's selective support for the beneficial strain.

244 *Invasion test 1. Time-limited supply of private resources.* — We model the two kinds of  
245 benefits conveyed by the private resources, as discussed earlier, the (1) Protected Growth of  
246 the beneficial strain for  $\tau$  time and (2) the Enhanced Metabolism of the beneficial strain for  $\tau$   
247 time, either leading to (2a) a higher population growth rate by the beneficial strain or to (2b) an  
248 increased antibiotic production by the beneficial strain.

249 In the Protected Growth scenario, before  $\tau$ , an  $s_+$  proportion of cohesive space on the host  
250 surface ( $s_+ = ss/N * 100$ , where  $ss$  is the number of protected sites) provides a safe growth  
251 opportunity for the beneficial strain, as individuals from the parasitic strain are prevented from  
252 invading (strict and pseudo-vertical transmission), or parasitic individuals invading this region  
253 get killed off (via host-provided allelochemicals). Only after  $\tau$  time has passed is the parasitic  
254 strain allowed to gain a foothold anywhere on the grid (empty or occupied). In other words, the  
255 private space resource becomes public at time  $\tau$ . During an invasion attempt, we place  $n_{P,t} = 0$   
256 number of individuals around a randomly selected focal grid point in a connected cluster with  
257 probability  $f$  in each time step (if there are empty places, subsequent individuals will be placed  
258 next to the focal site, but non-empty grid points can also be occupied if no empty places are  
259 available). In the Enhanced Metabolism scenario, the beneficial strain experiences increasing  
260 advantages of  $r_+ = (r_{B,pr}(t) + r_{B,0})/r_{B,0} * 100$  or  $\rho_+ = (\rho_{B,pr}(t) + \rho_{B,0})/\rho_{B,0} * 100$  for  $\tau$  time,

261 respectively, and  $n_{p,t} = 0$  number of parasitic-strain individuals are allowed to invade with  
262 probability  $f$  in each time step, starting from the beginning.

263 *Invasion test 2. Protected Growth of the beneficial strain to a minimum colony size.* — Here,  
264 we let the host resource, the habitat, be private until the beneficial strain reaches a minimum  
265 colony size, which we call the Colony Size at Invasion (CSI). We only allow the parasitic strain  
266 to start invading empty places after the resident **B** strain's colony size has grown to the CSI/  
267 ( $CSI = q/N * 100$ , where  $q$  is the number of sites inhabited by **B**). The invasion proceeds with  
268 probability  $f$  and with  $n_{p,t}$  number of invaders until the grid is fully occupied by individuals. As  
269 a motivating example, one can think of a small host 'crypt' in which beneficial strain is initially be  
270 housed, but the strain eventually outgrows the crypt and colonises the host surface, at which  
271 point, the host can only provide resources in a way that makes them publicly available.

## 272 Results

273 *Invasion test 1. Time-limited supply of private resources.* – As discussed in the *Introduction*,  
274 the host has multiple mechanisms by which it can provide private resources. We find that  
275 protecting initial growth (Fig. 2a, b), increasing the population growth rate (Fig. 2c, d), and/or  
276 enhancing the antibiotic effectiveness (Fig. 2e, f) of the beneficial strain can all result in a self-  
277 sustaining, beneficial-strain-dominated microbiome that is resistant to invasion even after the  
278 host resource is made public (at time  $\tau$ ) and the beneficial strain starts to experience a  
279 competitive disadvantage due to the costs of antibiotic production and of expressing its  
280 antibiotic-resistance traits. In all three scenarios, the longer the time  $\tau$  that the resource is  
281 private (Fig. 2, x-axis), the less of an advantage, in the form of protected growth (here  $\tau$   
282 correlates with the size of the colony, see Supplementary information 1 Fig. 1), increased  
283 population growth ( $r_+$ ), or increased antibiotic production ( $\rho_+$ ) (y-axis), is required for the  
284 beneficial strain to be able to resist invasion after the resource becomes public. This is because

285 invasion resistance is dependent on the beneficial colony reaching a sufficiently large size and  
286 on the concentration of antibiotic the colony produces and transports into the environment.

287 We also observe that if the physiological mechanism of resistance by the beneficial strain to  
288 its own antibiotic is efflux, this can additionally enhance invasion resistance, even if the supply  
289 time is short and the advantage conferred by the private resource is small (Fig. 2a, b, c vs. e, d,  
290 f). The reason is that re-exporting any ingested antibiotic increases the environmental  
291 concentration of antibiotic, which aids suppression of invading parasitic strains.

292 *Invasion test 2. Protected Growth of the beneficial strain until a minimum colony size. –*  
293 Consistent with the results from Invasion test 1, if the beneficial colony reaches a critical size,  
294 (the Minimum Sustainable Colony size: *MSC*) it becomes resistant to invasion over a wide  
295 range of parameters after the private resource is made public (Fig. 3). Again, having antibiotic  
296 efflux as the resistance mechanism promotes invasion resistance (Fig. 3 and 4), whereas (and  
297 intuitively) a higher rate of extracellular decay of antibiotic counteracts this effect (Fig. 3 and 4).  
298 When a large amount of antibiotic is in the environment, because efflux is high and decay is low  
299 (Fig. 3a and Fig. 4a, c), the beneficial strain is able to dominate over a wide range of diffusion  
300 rates. However, when efflux is weak and the extracellular decay rate is high, only high diffusion  
301 rates allow the beneficial strain to dominate (Fig. 4d). This is because at low diffusion rates, the  
302 antibiotic produced in the centre of the colony is lost due to decomposition before reaching the  
303 colony edge by diffusion, where it would have attacked invaders. In contrast, at high diffusion  
304 rates, more of the resident colony's antibiotic production is recruited to fight invasion (Fig. 3, 4,  
305 and 5).

306 The complement to this result is that if the diffusion rate is low, then even a large colony size  
307 does not necessarily guarantee success unless the efflux rate is also high enough (Fig. 4a, b).  
308 Essentially, if antibiotic efflux is used as the resistance mechanism by the beneficial cells, this  
309 can substitute for outright diffusion of the antibiotic, allowing the antibiotic to reach the colony  
310 edge, where it can suppress invaders (Fig. 4).

311 *Non-monotonous effect of diffusion.* — Interestingly, under some conditions there is a non-  
312 monotonous effect of diffusion rate on invasion resistance, such that the Minimum Colony Size  
313 (*MSC*) can be much smaller for medium-level diffusion rates. For example, looking at Fig. 3b,  
314 for low antibiotic diffusion rates (values 0 – 1 on the x-axis), the *MSC* is close to 100%; that is,  
315 the colony can resist invasion only if more than 95% of the available habitat is already occupied  
316 by the producers; otherwise, parasites displace the whole population of antibiotic producers.  
317 Similarly, for high diffusion rates (values  $D = 80 - 100$  on the x-axis), although smaller, but a  
318 considerable colony size still has to be reached. However, the *MSC* curve reaches a minimum  
319 between low and high diffusion rates, such that only a 1 – 10% *MSC* is enough to resist  
320 invasion (Fig. 3b).

321 The important result is that for any intermediate efflux and decay parameters and with  
322 intermediate diffusion rates, *colonies with practically any non-zero initial size can withstand*  
323 *parasite invasion* (Fig. 3a, b, d). This nonlinearity occurs because, in general, diffusion carries  
324 antibiotic to the edge of the antibiotic-producing colony, where it can act against invading **P**  
325 strains, but diffusion also carries antibiotic *away from* the edge of the colony. An intermediate  
326 diffusion rate turns out to maximise the amount of antibiotic at the fighting front.

## 327 **Discussion**

328 The composition of host-associated microbiomes has been shown to correlate with host  
329 health status and fitness [4, 81, 82, 83, 84, 85, 86, 87], and thus, there is likely strong selection  
330 on host species to evolve mechanisms that favour the assembly of certain kinds of microbiomes  
331 over others [11, 12, 27]. Here we have explored how a host can favour the assembly of a  
332 defensive microbiome dominated by antibiotic-producing bacteria, hence promoting colonization  
333 resistance, in a competitive set-up [7, 23, 74, 88].

334 We argue that a host can take advantage of an ecological phenomenon known as *bistability*.  
335 When two species compete via interference, such as when a bacterial species uses antibiotics

336 to hinder a competitor, the winner of the competition depends partially on the initial population  
337 sizes of the two species [9]. If the antibiotic-producer establishes itself with a larger population in  
338 the new habitat, it can collectively produce sufficient amount of antibiotic to suppress its  
339 competitor and grow until the space of opportunity vanishes for the parasite. In contrast, if the  
340 non-producer species starts with the larger or competitively superior population, then the small  
341 amount of antibiotic produced by the small colony of the producer is insufficient to suppress the  
342 non-producer, hence it wins.

343 It follows that by using an antibiotic-producer as the initial (or 'priming') strain of the  
344 microbiome, a host can narrow down the variety of strains able to invade this already  
345 established environment [4, 5, 9, 11]. The host is thus efficiently able to canalise the  
346 composition of the emerging microbiome. Such priming effects have been demonstrated in  
347 various experimental systems [25, 37, 39, 89].

348 We integrated local interactions and explicit spatial dynamics of cellular and chemical  
349 components in our model with the original phenomenological model that laid the foundations of  
350 the theory [9]. In this more realistic model, even for large populations, the number of directly  
351 interacting cells is relatively modest, and spatial correlations of active agents determine  
352 dynamics meaningfully [5, 75]. Furthermore, such an integrated, spatially-explicit model allows  
353 us to understand the effect of different antibiotic-resistance mechanisms [73, 76, 77, 78, 79, 80,  
354 90] on the microbiome assembly, and to investigate how attributes of the host surface, which  
355 govern the diffusion dynamic of the antibiotic, can modify the outcome. We have also widened  
356 the applicability of Scheuring and Yu's model [9] by reviewing multiple mechanisms allowing a  
357 host to prime a defensive microbiome, even if the beneficial can only be recruited from the  
358 environment (horizontal transmission), compared to the original model, which made the  
359 restrictive assumption that the beneficial strain is strictly vertically transmitted.

360 We have corroborated the earlier results [9, 13] that antibiotic producers and non-producers  
361 can form a bistable system and that the outcome of competition depends on their reproduction

362 rates, how effectively the host is able to selectively promote the beneficial strain, and the initial  
363 ratio of the two strains [9]. Once the antibiotic producer is able to gain dominance, in such a  
364 system, it can remain dominant for a lifetime, even if the host-provided private resource  
365 vanishes or becomes public. The current model also shows that localized interactions do not  
366 impede this dominance because the antibiotic itself can diffuse, eventually reaching the colony  
367 edge to inhibit invaders. This effect is strengthened when the mode of resistance by the  
368 producers is antibiotic efflux.

369 We also show with the current model that the host resource only needs to remain private for  
370 a finite critical time, basically until the beneficial colony reaches a Minimal Sustainable Colony  
371 Size (*MSC*), at which point it becomes resistant to a given rate of invasion. The critical time  
372 and/or the *MSC* depends on the physiochemical properties of the system, most importantly the  
373 decomposition, decay, diffusion, and efflux rates of the antibiotic, and the advantage provided to  
374 the beneficial colony by the private resource, all deriving from the fact that colony size  
375 determines the amount of antibiotic produced.

376 Our brief review of the literature suggests that multiple forms of 'private resources' exist,  
377 including food, space, or host-provided compounds harming undesired strains. Nonetheless,  
378 privacy of resources is inherently difficult and costly to achieve, and it is therefore realistic to  
379 assume that any host-provided resources will eventually become public. This inevitable  
380 transition from private to public, which intuitively might be expected to allow the successful  
381 invasion and establishment of parasitic strains, *does not in fact do so*, because of bistability.  
382 After a beneficial colony establishes itself, a public resource is in practice only enjoyed by the  
383 winner, the beneficial colony.

384 Finally, we show that an intermediate diffusion rate can maximise the amount of antibiotic  
385 accumulating at the colony edge. Our findings suggest that the attributes of the host surface, for  
386 example the diffusion rate, can either increase or reduce the effect range of the antibiotic [91].  
387 As there is no conflict of interest between antibiotic-producer and host, their coevolution is



388 expected to optimize the diffusion speed, and hence the effectiveness, of the antibiotic. Overall,  
389 evolutionary optimisation can act by minimising the host investment required to attain a  
390 beneficial microbiome, by reducing the duration of a private resource supply, and by evolving  
391 the optimal physiochemical properties of the habitat, the host surface. If so, then we might also  
392 expect that the co-evolution of host and preferred strains results in an efficient and well-  
393 conducted build-up of a beneficial microbiome, an orchestrated symbiosis that efficiently  
394 narrows down the enormous number of possible scenarios to canalise the emergence of the  
395 microbiome towards the most favourable one.

## 396 **Acknowledgements**

397 We acknowledge KIFÜ for awarding us access to resource based in Hungary at Budapest, Debrecen, and  
398 Szeged. We acknowledge supports from OTKA grants Nr. K100299, and GINOP grant Nr. 2.3.2-15-2016-  
399 00057. S.F.W. was funded by a NERC PhD studentship (NERC Doctoral Training Programme grant  
400 NE/L002582/1). D. W. Yu was supported by the National Natural Science Foundation of China  
401 (41661144002, 31670536, 31400470, 31500305), the Key Research Program of Frontier Sciences, CAS  
402 (QYZDY-SSW-SMC024), the Bureau of International Cooperation project (GJHZ1754), the Ministry of  
403 Science and Technology of China (2012FY110800), the University of East Anglia, the State Key  
404 Laboratory of Genetic Resources and Evolution at the Kunming Institute of Zoology, and the University of  
405 Chinese Academy of Sciences.

## 406 **Conflicts of interest**

407 The authors declare no conflict of interest.

## 408 **References**

- 409 1. Costello EK, Stagaman K, Dethlefsen L, Bohannan BJM, Relman DA. The application of  
410 ecological theory toward an understanding of the human microbiome. *Science* 2012; 336:  
411 1255–1262.
- 412 2. Levy R, Borenstein E. Metabolic modeling of species interaction in the human microbiome  
413 elucidates community-level assembly rules. *Proc Natl Acad Sci U S A* 2013; 110: 12804–  
414 12809.
- 415 3. Weber MF, Poxleitner G, Hebesch E, Frey E, Opitz M. Chemical warfare and survival  
416 strategies in bacterial range expansions. *J R Soc Interface* 2014; 11: 20140172.
- 417 4. McNally L, Brown SP. Building the microbiome in health and disease: niche construction  
418 and social conflict in bacteria. *Phil Trans R Soc Lond B Biol Sci* 2015; 370: 20140298.
- 419 5. Cordero OX, Datta MS. Microbial interactions and community assembly at microscales.  
420 *Curr Opin Microbiol* 2016; 31: 227–234.
- 421 6. Li L, Ma Z. Testing the neutral theory of biodiversity with human microbiome datasets. *Sci*  
422 *Rep* 2016; 6: 31448.
- 423 7. García-Bayona L, Comstock LE. Bacterial antagonism in host-associated microbial  
424 communities. *Science* 2018; 361: pii: eaat2456.
- 425 8. Zhang MM, Poulsen M, Currie CA. Symbiont recognition of mutualistic bacteria by  
426 *Acromyrmex* leaf-cutting ants. *ISME J* 2007; 1: 313–320.
- 427 9. Scheuring I, Yu DW. How to assemble a beneficial microbiome in three easy steps. *Ecol*  
428 *Lett* 2012; 15: 1300–1307.
- 429 10. Coyte KZ, Schluter J, Foster KR. The ecology of the microbiome: Networks, competition,  
430 and stability. *Science* 2015; 350: 663–666.
- 431 11. Foster KR, Schluter J, Coyte KZ, Rakoff-Nahoum S. The evolution of the host microbiome  
432 as an ecosystem on a leash. *Nature* 2017; 548: 43–51.

- 433 12. Duarte A, Welch M, Swannack C, Wagner J, Kilner RM. Strategies for managing rival  
434 bacterial communities: Lessons from burying beetles. *J Anim Ecol* 2018; 87: 414–427.
- 435 13. Innocent T, Holmes N, Al Bassam M, Schiott M, Scheuring I, Wilkinson B et al. Experimental  
436 demonstration that screening can enable the environmental recruitment of a defensive  
437 microbiome. *bioRxiv* 2018; <https://doi.org/10.1101/375634>.
- 438 14. Green JL, Bohannan BJ, Whitaker RJ. Microbial biogeography: from taxonomy to traits.  
439 *Science* 2008; 320: 1039–1043.
- 440 15. Jeraldo P, Sipos M, Chia N, Brulc JM, Dhillon AS, Konkel ME et al. Quantification of the  
441 relative roles of niche and neutral processes in structuring gastrointestinal microbiomes.  
442 *Proc Natl Acad Sci U S A* 2012; 109: 9692–9698.
- 443 16. Fondi M, Karkman A, Tamminen MV, Bosi E, Virta M, Fani R et al. “Every gene is  
444 everywhere but the environment selects”: Global geolocalization of gene sharing in  
445 environmental samples through network analysis. *Genome Biol Evol* 2016; 8: 1388–1400.
- 446 17. Engl T, Kroiss J, Kai M, Nechitaylo TY, Svatoš A, Kaltenpoth M. Evolutionary stability of  
447 antibiotic protection in a defensive symbiosis. *Proc Natl Acad Sci U S A* 2018; 115: E2020–  
448 E2029.
- 449 18. West SA, Diggle SP, Buckling A, Gardner A, Griffin AS. The social lives of microbes. *Annu*  
450 *Rev Ecol Evol Syst* 2007; 38: 53–77.
- 451 19. Bull JJ, Rice WR. Distinguishing mechanisms for the evolution of co-operation. *J Theor Biol*  
452 1991; 149: 63–74.
- 453 20. Herre EA, Knowlton N, Mueller UG, Rehner SA. The evolution of mutualisms: exploring the  
454 paths between conflict and cooperation. *Trends Ecol Evol* 1999; 14: 49–53.
- 455 21. Sachs JL, Mueller UG, Wilcox TP, Bull JJ. The evolution of cooperation. *Q Rev Biol* 2004;  
456 79: 135–160.
- 457 22. Ebert D. The epidemiology and evolution of symbionts with mixed-mode transmission. *Ann*  
458 *Rev Ecol Evol Syst* 2013; 44: 623–643.

- 459 23. Clay K. Defensive symbiosis: a microbial perspective. *Funct Ecol* 2014; 228: 293–298.
- 460 24. Frank S. Host-symbiont conflict over the mixing of symbiotic lineages. *Proc R Soc Lond B*  
461 *Biol Sci* 1996; 263: 339–344.
- 462 25. Marsh SE, Poulsen M, Pinto-Tomás A, Currie CR. Interaction between workers during a  
463 short time window is required for bacterial symbiont transmission in *Acromyrmex* leaf-  
464 cutting ants. *PLoS ONE* 2014; 9: e103269.
- 465 26. Currie CR, Poulsen M, Mendenhall J, Boomsma JJ, Billen J. Coevolved crypts and exocrine  
466 glands support mutualistic bacteria in fungus-growing ants. *Science* 2006; 311: 81–83.
- 467 27. Li H, Sosa-Calvo J, Horn HA, Pupo MT, Clardy J, Rabeling C et al. Convergent evolution of  
468 complex structures for ant–bacterial defensive symbiosis in fungus-farming ants. *Proc Natl*  
469 *Acad Sci U S A* 2018; e-pub ahead of print 3 October 2018; doi:10.1073/pnas.1809332115.
- 470 28. Kaltenpoth M, Göttler W, Herzner G, Strohm E. Symbiotic bacteria protect wasp larvae from  
471 fungal infestation. *Curr Biol* 2005; 15: 475–479.
- 472 29. Kaltenpoth M. *Actinobacteria* as mutualists: general healthcare for insects? *Trends*  
473 *Microbiol* 2009; 17: 529–535.
- 474 30. Seipke RF, Kaltenpoth M, Hutchings MI. *Streptomyces* as symbionts: an emerging and  
475 widespread theme? *FEMS Microbiol Rev* 2012; 36: 862–876.
- 476 31. Kroiss J, Kaltenpoth M, Schneider B, Schwinger MG, Hertweck C, Maddula RK et al.  
477 Symbiotic *Streptomyces* provide antibiotic combination prophylaxis for wasp offspring.  
478 *Nat Chem Biol* 2010; 6: 261–263.
- 479 32. O’Callaghan M. Microbial inoculation of seed for improved crop performance: issues and  
480 opportunities. *Appl Microbiol Biotechnol* 2016; 100: 5729–5746.
- 481 33. Deaker R, Roughley RJ, Kennedy IR. Legume seed inoculation technology – a review. *Soil*  
482 *Biol Biochem* 2004; 36: 1275–1288.
- 483 34. Werner GDA, Kiers ET. Order of arrival structures arbuscular mycorrhizal colonization of  
484 plants. *New Phytol* 2014; 205: 1515–1524.

- 485 35. Vojvodic S, Rehan SM, Anderson KE. Microbial gut diversity of Africanized and European  
486 honey bee larval instars. *PLoS ONE* 2013; 8:e72106.
- 487 36. Powell JE, Martinson VG, Urban-Mead K, Moran NA. Routes of acquisition of the gut  
488 microbiota of *Apis mellifera*. *Appl Environ Microbiol* 2014; 80: 7378–7387.
- 489 37. Schwarz RS, Moran NA, Evans JD. Early gut colonizers shape parasite susceptibility and  
490 microbiota composition in honey bee workers. *Proc Natl Acad Sci U S A* 2016; 113: 9345–  
491 9350.
- 492 38. Kwong WK, Moran NA. Gut microbial communities of social bees. *Nat Rev Microbiol* 2016;  
493 14: 374–384.
- 494 39. Andersen SB, Yek SH, Nash DR, Boomsma JJ. Interaction specificity between leaf-cutting  
495 ants and vertically transmitted *Pseudonocardia* bacteria. *BMC Evol Biol* 2015; 15: 27.
- 496 40. Martínez-García Á, Martín-Vivaldi M, Rodríguez-Ruano SM, Peralta-Sánchez JM, Valdivia  
497 E, Soler JJ. Nest bacterial environment affects microbiome of hoopoe eggshells, but not  
498 that of the uropygial secretion. *PLoS ONE* 2016; 11: e0158158.
- 499 41. Truyens S, Weyens N, Cuypers A, Vangronsveld J. Changes in the population of seed  
500 bacteria of transgenerationally Cd-exposed *Arabidopsis thaliana*. *Plant Biol* 2012; 15: 971–  
501 981.
- 502 42. Turnbaugh PJ, Hamady M, Yatsunenko T, Cantarel BL, Duncan A, Ley RE et al. A core gut  
503 microbiome in obese and lean twins. *Nature* 2009; 457: 480–484.
- 504 43. Bais HP, Weir TL, Perry LG, Gilroy S, Vivanco JM. The role of root exudates in rhizosphere  
505 interactions with plants and other organisms. *Annu Rev Plant Biol* 2006; 57: 233–66.
- 506 44. Hartmann A, Schmid M, van Tuinen D, Berg G. Plant-driven selection of microbes. *Plant*  
507 *Soil* 2008; 321: 235–257.
- 508 45. Neal AL, Ahmad S, Gordon-Weeks R, Ton J. Benzoxazinoids in root exudates of maize  
509 attract *Pseudomonas putida* to the rhizosphere. *PLoS ONE* 2012; 7: e35498.

- 510 46. De Coninck B, Timmermans P, Vos C, Cammue BP, Kazan K. What lies beneath:  
511 belowground defense strategies in plants. *Trends Plant Sci* 2015; 20: 91–101.
- 512 47. Cai T, Cai W, Zhang J, Zheng H, Tsou AM, Xiao L et al. Host legume-exuded  
513 antimetabolites optimize the symbiotic rhizosphere. *Mol Microbiol* 2009; 73: 507–517.
- 514 48. Fang FC. Antimicrobial reactive oxygen and nitrogen species: concepts and controversies.  
515 *Nat Rev Microbiol* 2004; 2: 820–832.
- 516 49. Wang Y, Ruby EG. The roles of NO in microbial symbioses. *Cell Microbiol* 2011; 13: 518–  
517 526.
- 518 50. Mandel MJ, Dunn AK. Impact and influence of the natural vibrio-squid symbiosis in  
519 understanding bacterial-animal interactions. *Front Microbiol* 2016; 15: 1982.
- 520 51. Davidson SK, Koropatnick TA, Kossmehl R, Sycuro L, McFall-Ngai MJ. NO means 'yes' in  
521 the squid-vibrio symbiosis: nitric oxide (NO) during the initial stages of a beneficial  
522 association. *Cell Microbiol* 2004; 6: 1139–1151.
- 523 52. Ruby EG, McFall-Ngai MJ. Oxygen-utilizing reactions and symbiotic colonization of the  
524 squid light organ by *Vibrio fischeri*. *Trends Microbiol* 1999; 7: 414–420.
- 525 53. Poole RK, & Hughes MN. New functions for the ancient globin family: bacterial responses  
526 to nitric oxide and nitrosative stress. *Mol Microbiol* 2000; 36: 775–783.
- 527 54. Wang Y, Dufour YS, Carlson HK, Donohue TJ, Marletta MA, Ruby EG. H-NOX-mediated  
528 nitric oxide sensing modulates symbiotic colonization by *Vibrio fischeri*. *Proc Natl Acad Sci*  
529 *U S A* 2010; 107: 8375–8380.
- 530 55. Wang Y, Dunn AK, Wilneff J, McFall-Ngai MJ, Spiro S, Ruby EG. *Vibrio fischeri*  
531 flavohaemoglobin protects against nitric oxide during initiation of the squid–*Vibrio*  
532 symbiosis. *Mol Microbiol* 2010; 78: 903–915.
- 533 56. Franzenburg S, Walter J, Künzel S, Wang J, Baines JF, Bosch TCG et al. Distinct  
534 antimicrobial peptide expression determines host species-specific bacterial associations.  
535 *Proc Natl Acad Sci U S A* 2013; 110: E3730–E3738.

- 536 57. Pietschke C, Treitz C, Forêt S, Schultze A, Künzel S, Tholey A et al. Host modification of a  
537 bacterial quorum-sensing signal induces a phenotypic switch in bacterial symbionts. *Proc*  
538 *Natl Acad Sci U S A* 2017; 114: E8488–E8497.
- 539 58. Bernier SP, Surette MG. Concentration-dependent activity of antibiotics in natural  
540 environments. *Front Microbiol* 2013; 13: 20.
- 541 59. Schluter J, Nadell CD, Bassler BL, Foster KR. Adhesion as a weapon in microbial  
542 competition. *ISME J* 2015; 9: 139–149.
- 543 60. McLoughlin K, Schluter J, Rakoff-Nahoum S, Smith AL, Foster KR. Host selection of  
544 microbiota via differential adhesion. *Cell Host Microbe* 2016; 19: 550–559.
- 545 61. Raina J-B, Dinsdale EA, Willis BL, Bourne DG. Do the organic sulfur compounds DMSP  
546 and DMS drive coral microbial associations. *Trends Microbiol* 2010; 18: 101–108.
- 547 62. Raina J-B, Tapiolas D, Motti CA, Foret S, Seemann T, Tebben J et al. Isolation of an  
548 antimicrobial compound produced by bacteria associated with reef-building corals. *PeerJ*  
549 2016; 18: e2275.
- 550 63. Raina J-B, Tapiolas DM, Foret S, Lutz A, Abrego D, Ceh J et al. DMSP biosynthesis by an  
551 animal and its role in coral thermal stress response. *Nature* 2013; 502: 677–680.
- 552 64. Raina J-B, Tapiolas DM, Willis BL, Bourne DG. Coral-associated bacteria and their role in  
553 the biogeochemical cycling of sulfur. *Appl Environ Microbiol* 2009; 75: 3492–3501.
- 554 65. Apprill A, Marlow HQ, Martindale MQ, Rappé MS. The onset of microbial associations in the  
555 coral *Pocillopora meandrina*. *ISME J* 2009; 3: 685–699.
- 556 66. Zivkovic AM, German JB, Lebrilla CB, Mills DA. Human milk glyco-biome and its impact on  
557 the infant gastrointestinal microbiota. *Proc Natl Acad Sci U S A* 2011; 108: 4653–4658.
- 558 67. Haichar FZ, Marol C, Berge O, Rangel-Castro JI, Prosser JI, Balesdent J et al. Plant host  
559 habitat and root exudates shape soil bacterial community structure. *ISME J* 2008; 2: 1221–  
560 1230.

- 561 68. Badri DV, Vivanco JM. Regulation and function of root exudates. *Plant Cell Environ* 2009;  
562 32: 666–681.
- 563 69. Dennis PG, Miller AJ, Hirsch PR. Are root exudates more important than other sources of  
564 rhizodeposits in structuring rhizosphere bacterial communities? *FEMS Microbiol Ecol* 2010;  
565 72: 313–327.
- 566 70. Badri DV, Chaparro JM, Zhang R, Shen Q, Vivanco JM. Application of natural blends of  
567 phytochemicals derived from the root exudates of *Arabidopsis* to the soil reveal that  
568 phenolic-related compounds predominantly modulate the soil microbiome. *J Biol Chem*  
569 2013; 288: 4502–4512.
- 570 71. Lebeis SL, Paredes SH, Lundberg DS, Breakfield N, Gehring J, McDonald M et al. Salicylic  
571 acid modulates colonization of the root microbiome by specific bacterial taxa. *Science* 2015;  
572 349: 860–864.
- 573 72. Ishiyama D, Vujaklija D, Davies J. Novel pathway of salicylate degradation by *Streptomyces*  
574 *sp.* strain WA46. *Appl Environ Microbiol* 2004; 70: 1297–1306.
- 575 73. Wright GD. Mechanisms of resistance to antibiotics. *Curr Opin Chem Biol* 2003; 7: 563–  
576 569.
- 577 74. Ghoul M, Mitri S. The ecology and evolution of microbial competition. *Trends Microbiol*  
578 2016; 24: 833–845.
- 579 75. Raynaud X, Nunan N. Spatial ecology of bacteria at the microscale in soil. *PLoS ONE*  
580 2014; 9: e87217.
- 581 76. Wright GD. Bacterial resistance to antibiotics: enzymatic degradation and modification. *Adv*  
582 *Drug Deliv Rev* 2005; 57: 1451–1470.
- 583 77. Kumar A, Schweizer HP. Bacterial resistance to antibiotics: active efflux and reduced  
584 uptake. *Adv Drug Deliv Rev* 2005; 57: 1486–513.
- 585 78. Marquez B. Bacterial efflux systems and efflux pumps inhibitors. *Biochimie* 2005; 87: 1137–  
586 1147.



- 587 79. Davies J, Davies D. Origins and evolution of antibiotic resistance. *Microbiol Mol Biol Rev*  
588 2010; 74: 417–433.
- 589 80. Kondrat S, Zimmermann O, Wiechert W, von Lieres E. Discrete-continuous reaction-  
590 diffusion model with mobile point-like sources and sinks. *Eur Phys J E* 2016; 39: 11.
- 591 81. Rodriguez R, Redman R. More than 400 million years of evolution and some plants still  
592 can't make it on their own: plant stress tolerance via fungal symbiosis. *J Exp Bot* 2008; 59:  
593 1109–1114.
- 594 82. Lau JA, Lennon JT. Evolutionary ecology of plant–microbe interactions: soil microbial  
595 structure alters selection on plant traits. *New Phytol* 2011; 192: 215–224.
- 596 83. Rolli E, Marasco R, Vigani G, Ettoumi B, Mapelli F, Deangelis ML et al. Improved plant  
597 resistance to drought is promoted by the root-associated microbiome as a water stress-  
598 dependent trait. *Environ Microbiol* 2014; 17: 316–31.
- 599 84. Wang ZK, Yang YS, Stefka AT, Sun G, Peng LH. Review article: fungal microbiota and  
600 digestive diseases. *Aliment Pharmacol Ther* 2014; 39: 751–766.
- 601 85. Mueller UG, Sachs JL. Engineering microbiomes to improve plant and animal health.  
602 *Trends Ecol Evol* 2015; 23: 606–617.
- 603 86. Shreiner AB, Kao JY, Young VB. The gut microbiome in health and in disease. *Curr Opin*  
604 *Gastroenterol* 2015; 31: 69–75.
- 605 87. Lloyd-Price J, Abu-Ali G, Huttenhower C. The healthy human microbiome. *Genome Med*  
606 2016; 8: 51.
- 607 88. Lloyd DP, Allen RJ. Competition for space during bacterial colonization of a surface. *J R*  
608 *Soc Interface* 2015; 12: 20150608.
- 609 89. Haichar FZ, Santaella C, Heulin T, Achouak W. Root exudates mediated interactions  
610 belowground. *Soil Biol Biochem* 2014; 77: 69–80.
- 611 90. Wright GD. Antibiotic resistance in the environment: a link to the clinic? *Curr Opin Microbiol*  
612 2010; 13: 589–594.

- 613 91. Harcombe WR, Riehl WJ, Dukovski I, Granger BR, Betts A, Lang AH et al. Metabolic  
614 resource allocation in individual microbes determines ecosystem interactions and spatial  
615 dynamics. *Cell Metab* 2014; 7: 1104–1115.

616 **Figures**

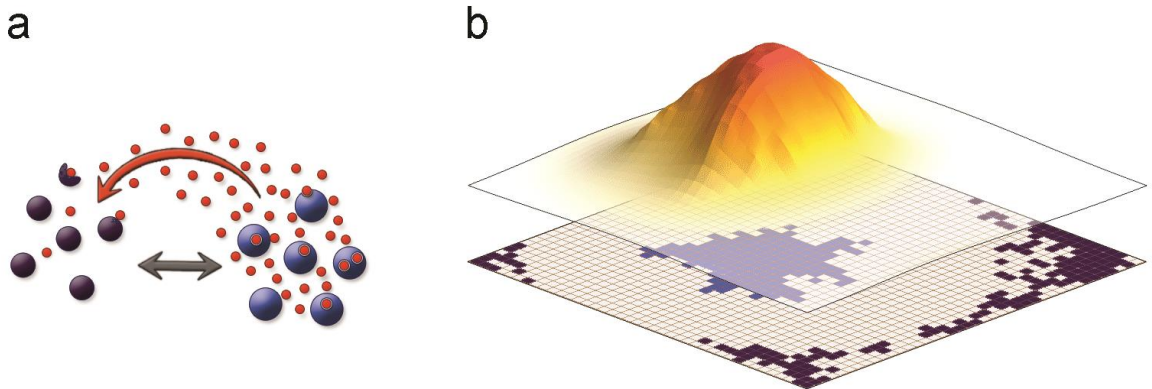

617

618 **Figure 1.** **a** We model two types of strains, parasitic (violet shading) and antibiotic-producer  
619 (blue shading), which compete with each other directly (grey arrow), and indirectly via the  
620 diffusing antibiotic (red dots and coloured arrows). **b** The modelled  $N = M * M$  grid (bottom  
621 layer) represents the colonisable surface of the host, and each point in the grid can be inhabited  
622 by a single individual (coloured quadrant). The produced antibiotic (upper layer) diffuses freely  
623 on the grid, and its concentration decreases farther from the producing source (the shading and  
624 height depicting the concentration) and also decays with time. Relevant model parameters are:  
625  $D = 5$ ,  $\Delta t = 1/10$ ,  $u = 100$ , for **a**  $n_{B,0} = 100$ ,  $N = 10\,000$ , and for **b**  $n_{B,0} = 1$ ,  $M = 40$ ,  $\rho = 1$ ,  
626  $\alpha_B = 0.5$ ,  $\beta_B = 0.6$ ,  $\gamma_B = 0.3$ ,  $\varphi = 0.5$ .

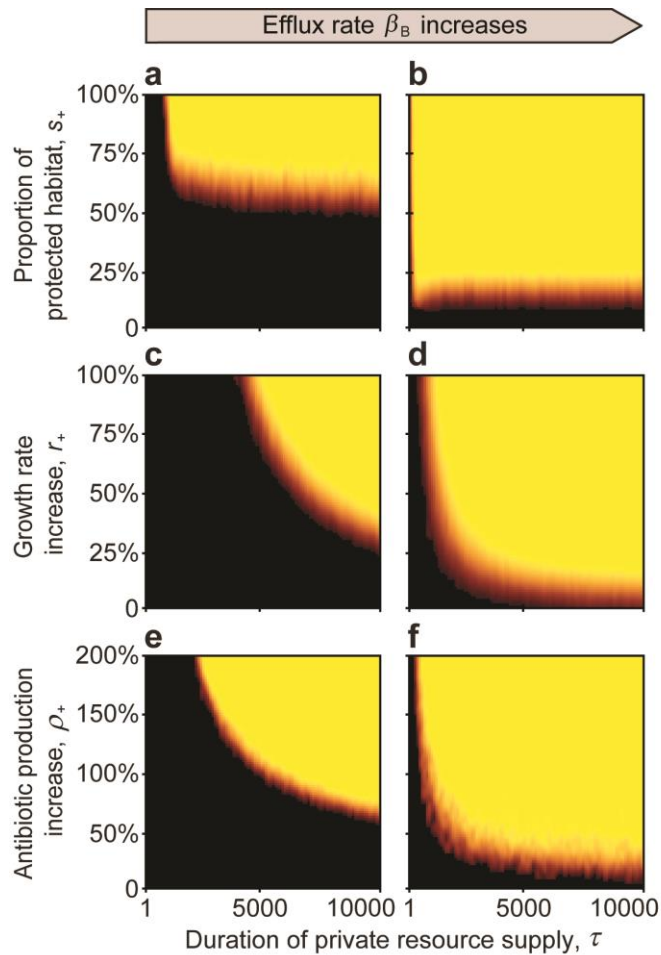

627

628 **Figure 2.** The effect of a private resource supplied by the host for a limited time  $\tau$  (*Invasion Test*

629 1). Black areas indicate parameter space where the non-producing parasitic strain can invade,

630 and yellow indicates that the beneficial strain is able to resist invasion. Orange to red colours

631 indicate mixed outcomes. In general, the beneficial strain (yellow) dominates over a larger

632 proportion of the parameter space as the duration of the private resource supply lengthens,

633 regardless of whether the beneficial strain enjoys outright protected growth (**a, b**), an increased

634 rate of population growth (**c, d**), or an increased rate of antibiotic production (**e, f**). The efflux of

635 accumulated intracellular antibiotic in the antibiotic-producing beneficial strain also aids

636 beneficial-strain dominance ( $\beta_B = 0$  for **a, c, e**, and  $\beta_B = 0.25$  for **b, d, f**). Simulations were run

637 with 5 replicates for 100 000 generations or until the population was homogenous. Model

638 parameters are:  $r_{B,0} = 0.8$ ,  $r_{P,0} = 0.8$ ,  $c = 0.1$ ,  $\rho_{B,0} = 1$ ,  $\alpha_B = 0.5$ ,  $\alpha_P = 0.5$ ,  $\beta_P = 0$ ,  $\gamma_B = 0.4$ ,

639  $\gamma_P = 0.4$ ,  $D = 5$ ,  $a = 1$ ,  $T = 1$ ,  $k = 25$ ,  $N = 10\,000$ ,  $n_{B,0} = 100$ ,  $n_{P,t} = 10$ ,  $f = 0.01$ ,  $D = 5$ ,

640  $\Delta t = 1/10$ ,  $u = 100$ ,  $\varphi = 0.3$  for **a, b, c, d**,  $\varphi = 0.4$  for **e, f**, and  $r_{B,pr}(t) = 0$ , and  $\rho_{B,pr}(t) = 0$

641 when applicable.

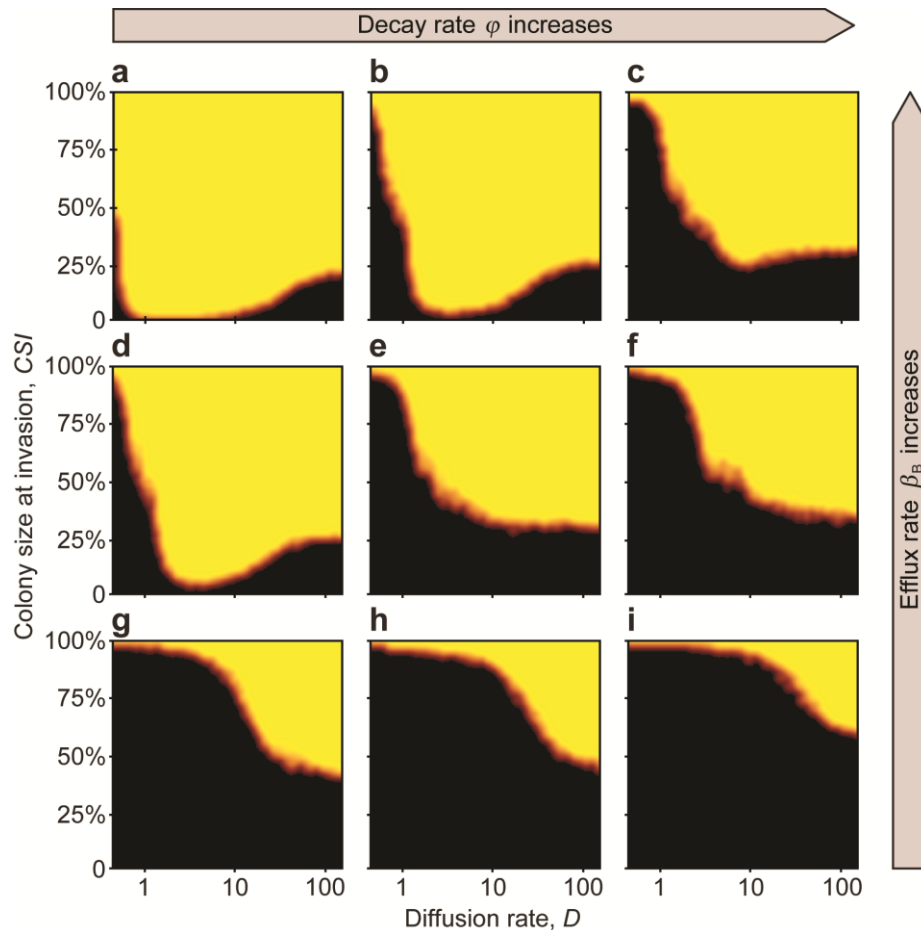

642

643 **Figure 3.** The Minimal Sustainable Colony size (*MSC*) (*Invasion Test 2*). Invasion is initiated  
 644 when the beneficial-strain colony reaches a defined size (*CSI*) and continues until the habitat is  
 645 fully colonized by either the beneficial or the parasitic strains. The *MSC* is represented by the  
 646 orange-red border separating the yellow (**B** wins) and black (**P** wins) regions. From left to right  
 647 (**a**→**c**, **d**→**f**, and **g**→**i**), the  $\phi$  extracellular decay rate of the antibiotic increases ( $\phi =$   
 648  $0.2, 0.25, 0.3$ ). From top to bottom (**a**→**g**, **b**→**h**, and **c**→**i**), the efflux rate  $\beta_B$  decreases ( $\beta_B =$   
 649  $1, 0.5, 0$ ). Simulations were run with 3 replicates for 100 000 generations, or until the population  
 650 was homogenous. Black areas indicate parameter space where the parasitic strain can invade,  
 651 yellow indicates parameter space where the antibiotic-producing beneficial strain successfully  
 652 resists invasion, and orange areas correspond to mixed outcomes. Model parameters are :  
 653  $r_{B,0} = 0.8$ ,  $r_{P,0} = 0.8$ ,  $r_+ = 0$ ,  $c = 0.4$ ,  $\rho_{B,0} = 1$ ,  $\rho_+ = 0$ ,  $\alpha_B = 0.5$ ,  $\alpha_P = 0.5$ ,  $\beta_P = 0$ ,  $\gamma_B = 0.4$ ,  
 654  $\gamma_P = 0.4$ ,  $D = 5$ ,  $a = 1$ ,  $T = 1$ ,  $k = 25$ ,  $N = 10\ 000$ ,  $n_{B,0} = 100$ ,  $n_{P,t} = 10$ ,  $f = 0.01$ ,  $\Delta t = 1/10$ ,  
 655  $u = 100$ .

656

657

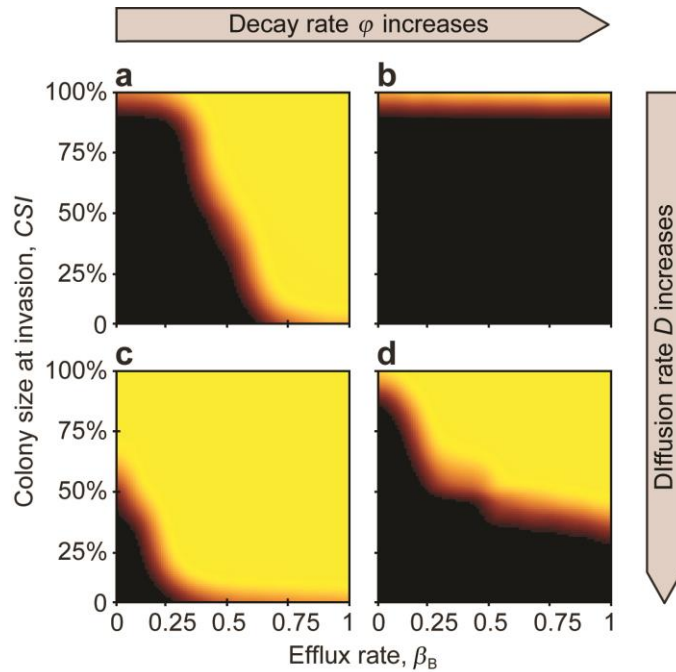

658

659 **Figure 4.** The effect of efflux rate, decay rate, and diffusion rate on the *MSC*. At low diffusion  
660 rates (upper row), efflux rate limits the success, while at large diffusion rate (bottom row), colony  
661 size is the more limiting factor. From left to right (**a**→**b**, **c**→**d**) extracellular decay rate increases  
662 ( $\phi = 0.7$  and  $0.9$ ). From the top to the bottom (**a**→**c**, and **b**→**d**), diffusion rate increases ( $D = 0.5$   
663 and  $12$ ), respectively. Model parameters are:  $r_{B,0} = 0.8$ ,  $r_{P,0} = 0.8$ ,  $r_+ = 0$ ,  $c = 0.1$ ,  $\rho_{B,0} = 1$ ,  
664  $\rho_+ = 0$ ,  $\alpha_B = 0.6$ ,  $\alpha_P = 0.6$ ,  $\beta_P = 0$ ,  $\gamma_B = 0.3$ ,  $\gamma_P = 0.3$ ,  $a = 1$ ,  $T = 1$ ,  $k = 25$ ,  $\tau = 300$ ,  $N =$   
665  $10\,000$ ,  $n_{B,0} = 100$ ,  $n_{P,t} = 10$ ,  $f = 0.01$ ,  $\Delta t = 1/10$ ,  $u = 100$ .

666

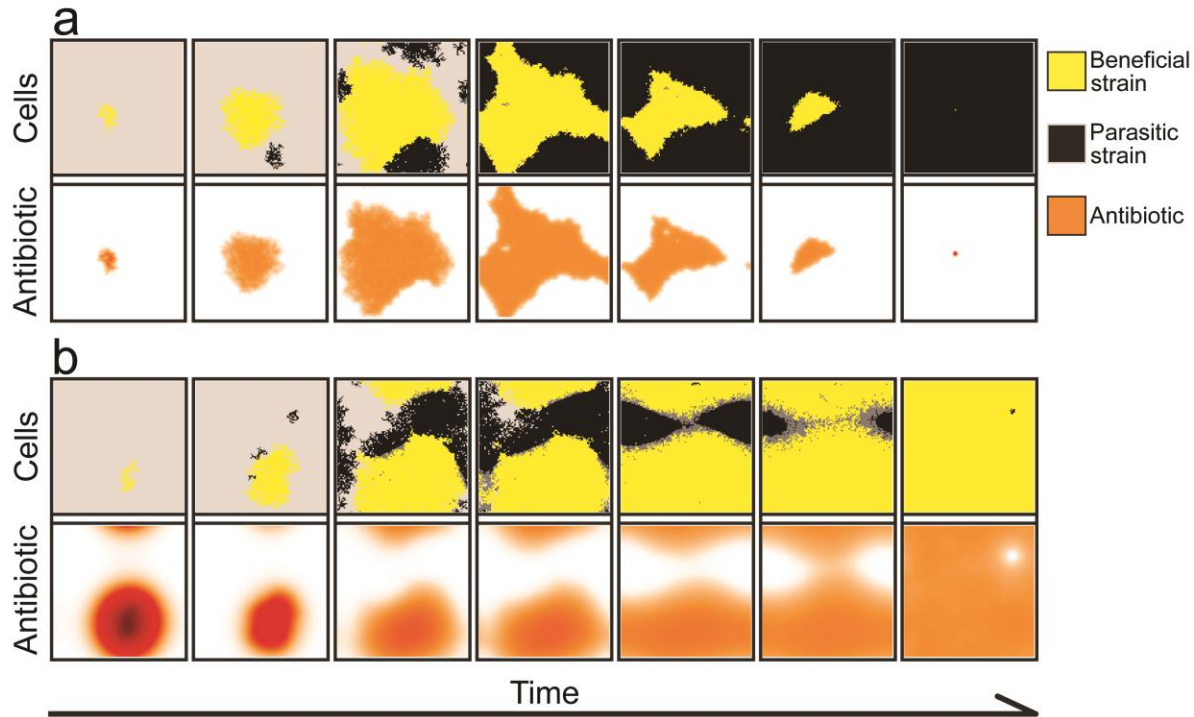

667

668 **Figure 5.** The spatial dynamics for **(a)** low ( $D = 0.5$ ) and **(b)** high diffusion ( $D = 50$ ) rates. **a** A  
 669 low diffusion rate reduces the protective effect of the antibiotic (orange shading, lower panels),  
 670 and the parasitic strain (black shading, upper panels) can invade the beneficial strain (yellow  
 671 shading, upper panels). **b** A high diffusion rate allows the beneficial strain to resist invasion, as  
 672 considerable amount of antibiotic (lower panels) diffuses beyond the colony boundaries.  
 673 Antibiotic concentration ranges between zero (white), to intermediate (red-orange), to maximal  
 674 concentrations (brown-black). Poisoned (cells with  $r_p < 0.05$ ) but not yet removed parasitic cells  
 675 are coloured grey. In these simulations, the beneficial colony was allowed  $\tau = 300$  time steps to  
 676 grow before invasion. The snapshots of the simulations are taken every 30 update steps. Model  
 677 parameters are:  $r_{B,0} = 0.8$ ,  $r_{P,0} = 0.8$ ,  $r_+ = 0$ ,  $c = 0.4$ ,  $\rho_{B,0} = 1$ ,  $\rho_+ = 0$ ,  $\alpha_B = 0.5$ ,  $\alpha_P = 0.5$ ,  
 678  $\beta_B = 0.4$ ,  $\beta_P = 0$ ,  $\gamma_B = 0.4$ ,  $\gamma_P = 0.4$ ,  $\varphi = 0.25$ ,  $a = 1$ ,  $T = 1$ ,  $k = 25$ ,  $\tau = 300$ ,  $N = 10\,000$ ,  
 679  $n_{B,0} = 100$ ,  $n_{P,t} = 10$ ,  $f = 0.01$ ,  $\Delta t = 1/10$ ,  $u = 100$ .

## 680 **Supplementary information**

681

682 **Supplementary information 1. The growth dynamic of a colony in the individual-based**  
683 **model.** The colony growth follows a logistic growth dynamic in the model (Supplementary Fig.  
684 1). Depending on the choice of  $\varepsilon$ , we observe full colonisation of the surface within a given  
685 timeframe. To better investigate the competition dynamics between the two types on a fine  
686 timescale, we choose  $\varepsilon = 0.01$  for our investigations.

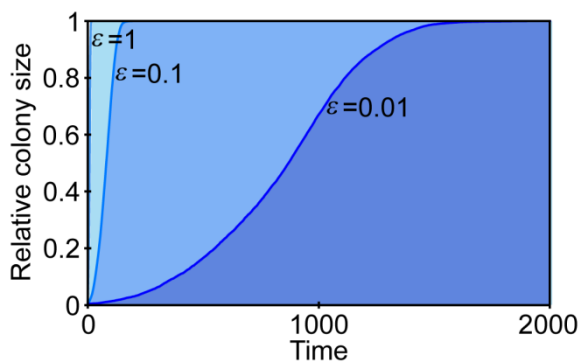

687

### 688 **Supplementary Figure 1.**

689 The growth dynamic of a colony follows a logistic trend in the model. We show the relative  
690 colony size (y-axis) with respect to time (x-axis) with  $\varepsilon = 1$  (light blue),  $\varepsilon = 0.1$  (medium blue),  
691 and  $\varepsilon = 0.01$  (dark blue), where  $\varepsilon$  is the fraction of randomly chosen grid cells that is updated in  
692 the cellular reproduction and death processes. The smaller the  $\varepsilon$ , the slower the growth in our  
693 model. Relevant model parameters are:  $D = 5$ ,  $\Delta t = 1/10$ ,  $u = 100$ , for **a**  $n_{B,0} = 100$ ,  $N =$   
694 10 000.

695



696 **Supplementary information 2. Mathematical formulation of the reaction-diffusion**  
697 **dynamics for the mean-field model.**

698 We assume that the antibiotic molecules are point-like particles moving on a host-surface  
699 plane. Consequently, we can use reaction-diffusion dynamics to describe change in the  
700 extracellular antibiotic concentration  $A^{Ext}(\mathbf{x}, t)$  at points  $\mathbf{x} = (x, y)$  (representing the coordinates  
701 on a surface) and times  $t$

702 (6)

$$\frac{\partial A^{Ext}(\mathbf{x}, t)}{\partial t} = D \left( \frac{\partial^2 A^{Ext}(\mathbf{x}, t)}{\partial x^2} + \frac{\partial^2 A^{Ext}(\mathbf{x}, t)}{\partial y^2} \right) + F(A^{Ext}(\mathbf{x}, t))$$

703 where the first term on the right hand side is the diffusion term, and  $F(A^{Ext}(\mathbf{x}, t))$  is the  
704 reaction term, which depends on the extracellular antibiotic concentration ( $A^{Ext}$ ) and the  
705 positions and types of the cells. Using the above defined parameters and dynamical processes,  
706 we can write

707 (7) 
$$F(A^{Ext}(\mathbf{x}, t)) = \sum_{i=1}^N (\rho_*(t) + \beta_* A^{Int}(i, t) - \alpha_* A^{Ext}(i, t)) \delta(\mathbf{x} - i) - \varphi A^{Ext}(i, t),$$

708 where the antibiotic sources and sinks are summed in the parentheses,  $i$  is the position of a  
709 cell among the  $N$  cells, which can either be **B** or **P** denoted by  $*$  in the bottom index where  
710 applicable,  $A^{Int}(i, t)$  is the intracellular concentration of the antibiotic at position  $i$ , and  $\delta$  is the  
711 Dirac delta [80].
